# Supplementary material for: The number of key carcinogenic events can be predicted from cancer incidence
Source: PubMed Central journal article supplement (PMC5610194; doi:10.1038/s41598-017-12448-7), 2017-09-22
Supplement: 41598_2017_12448_MOESM1_ESM.pdf [file 41598_2017_12448_MOESM1_ESM.pdf]

## The number of key carcinogenic events can be predicted from cancer incidence

Aleksey V. Belikov

**Supplementary Table S1. Comparison of the goodness of fit ( $R^2$ ) of different statistical distributions to actual distributions of cancer incidence by age.**

| Cancer type           | Extreme value | Gamma         | Logistic      | Normal        | Weibull       |
|-----------------------|---------------|---------------|---------------|---------------|---------------|
| Prostate              | 0.9960        | <b>0.9992</b> | 0.9954        | 0.9990        | 0.9922        |
| Lung and bronchus     | 0.9964        | 0.9981        | 0.9994        | 0.9994        | <b>0.9995</b> |
| Colon and rectum      | 0.9992        | 0.9991        | 0.9992        | 0.9995        | <b>0.9996</b> |
| Breast                | 0.9980        | <b>0.9982</b> | 0.9905        | 0.9961        | 0.9965        |
| Bladder               | 0.9993        | 0.9995        | 0.9994        | <b>0.9999</b> | <b>0.9999</b> |
| Non-Hodgkin lymphomas | 0.9971        | 0.9965        | <b>0.9997</b> | 0.9982        | 0.9981        |
| Uterus                | <b>0.9957</b> | 0.9954        | 0.9849        | 0.9918        | 0.9830        |
| Pancreas              | <b>0.9999</b> | <b>0.9999</b> | 0.9986        | <b>0.9999</b> | 0.9997        |
| Melanoma              | 0.9975        | 0.9963        | <b>0.9987</b> | 0.9981        | 0.9970        |
| Leukaemias            | 0.9964        | 0.9957        | <b>0.9986</b> | 0.9971        | 0.9966        |
| Kidney                | 0.9963        | 0.9972        | 0.9988        | 0.9993        | <b>0.9995</b> |
| Ovary                 | <b>0.9991</b> | 0.9989        | 0.9959        | 0.9988        | 0.9987        |
| Stomach               | 0.9988        | 0.9986        | <b>0.9999</b> | 0.9995        | 0.9996        |
| Oral cavity           | <b>0.9990</b> | 0.9984        | 0.9867        | 0.9948        | 0.9915        |
| Myeloma               | 0.9991        | 0.9992        | 0.9993        | NC            | <b>0.9999</b> |
| Oesophagus            | 0.9997        | <b>0.9999</b> | 0.9960        | 0.9996        | 0.9978        |
| Liver                 | <b>0.9873</b> | 0.9863        | 0.9700        | 0.9803        | 0.9774        |
| Brain                 | 0.9828        | 0.9779        | <b>0.9924</b> | 0.9861        | 0.9808        |
| Thyroid               | 0.9709        | <b>0.9745</b> | 0.9452        | 0.9608        | 0.9726        |
| Larynx                | 0.9962        | <b>0.9989</b> | 0.9959        | NC            | 0.9957        |
| <b>Average</b>        | 0.9952        | <b>0.9954</b> | 0.9922        | 0.9943        | 0.9938        |

Cancer types are listed in the order of decreasing incidence. The best fit for each cancer type is highlighted in bold. NC – not converged.

## The number of key carcinogenic events can be predicted from cancer incidence

Aleksey V. Belikov

**Supplementary Table S2. Comparison of the standard deviation of the residuals (Sy.x) of different statistical distributions fitted to actual distributions of cancer incidence by age.**

| Cancer type           | Extreme value | Gamma         | Logistic      | Normal        | Weibull       |
|-----------------------|---------------|---------------|---------------|---------------|---------------|
| Prostate              | 25.14         | <b>11.62</b>  | 27.08         | 12.90         | 35.39         |
| Lung and bronchus     | 11.51         | 8.325         | 4.555         | 4.602         | <b>4.078</b>  |
| Colon and rectum      | 3.380         | 3.635         | 3.482         | 2.698         | <b>2.501</b>  |
| Breast                | 4.980         | <b>4.624</b>  | 10.72         | 6.900         | 6.530         |
| Bladder               | 1.707         | 1.483         | 1.553         | <b>0.6948</b> | 0.7928        |
| Non-Hodgkin lymphomas | 2.281         | 2.531         | <b>0.6876</b> | 1.782         | 1.857         |
| Uterus                | <b>2.716</b>  | 2.828         | 5.114         | 3.772         | 5.422         |
| Pancreas              | 0.2555        | 0.2557        | 1.197         | <b>0.2553</b> | 0.5343        |
| Melanoma              | 1.424         | 1.709         | <b>1.002</b>  | 1.231         | 1.538         |
| Leukaemias            | 1.713         | 1.871         | <b>1.056</b>  | 1.530         | 1.651         |
| Kidney                | 1.794         | 1.577         | 1.035         | 0.7812        | <b>0.6379</b> |
| Ovary                 | <b>0.6286</b> | 0.7051        | 1.369         | 0.7335        | 0.7754        |
| Stomach               | 0.6028        | 0.6505        | <b>0.2149</b> | 0.3979        | 0.3404        |
| Oral cavity           | <b>0.5949</b> | 0.7436        | 2.151         | 1.351         | 1.722         |
| Myeloma               | 0.4878        | 0.4480        | 0.4295        | NC            | <b>0.1174</b> |
| Oesophagus            | 0.2079        | <b>0.0905</b> | 0.7637        | 0.2535        | 0.5634        |
| Liver                 | <b>1.256</b>  | 1.304         | 1.934         | 1.567         | 1.678         |
| Brain                 | 1.104         | 1.251         | <b>0.7343</b> | 0.9922        | 1.166         |
| Thyroid               | 1.087         | <b>1.019</b>  | 1.492         | 1.262         | 1.056         |
| Larynx                | 0.5138        | <b>0.2734</b> | 0.5373        | NC            | 0.5493        |
| <b>Average</b>        | 3.169         | <b>2.347</b>  | 3.355         | 2.428         | 3.445         |

Cancer types are listed in the order of decreasing incidence. The best fit for each cancer type is highlighted in bold. NC – not converged.

## The number of key carcinogenic events can be predicted from cancer incidence

Aleksey V. Belikov

**Supplementary Table S3. Comparison of the goodness of fit ( $R^2$ ) of different statistical distributions to actual distributions of prostate cancer incidence by age.**

| <b>Year of observation</b> | <b>Extreme value</b> | <b>Gamma</b>  | <b>Logistic</b> | <b>Normal</b> | <b>Weibull</b> |
|----------------------------|----------------------|---------------|-----------------|---------------|----------------|
| 1999                       | 0.9974               | <b>0.9992</b> | 0.9920          | NC            | 0.9885         |
| 2000                       | 0.9972               | <b>0.9992</b> | 0.9921          | NC            | 0.9886         |
| 2001                       | 0.9960               | <b>0.9993</b> | 0.9939          | NC            | 0.9907         |
| 2002                       | 0.9972               | <b>0.9994</b> | 0.9921          | NC            | 0.9886         |
| 2003                       | 0.9971               | <b>0.9991</b> | 0.9914          | NC            | 0.9876         |
| 2004                       | 0.9967               | <b>0.9988</b> | 0.9911          | NC            | 0.9872         |
| 2005                       | 0.9964               | <b>0.9990</b> | 0.9921          | NC            | 0.9882         |
| 2006                       | 0.9959               | <b>0.9991</b> | 0.9923          | NC            | 0.9874         |
| 2007                       | 0.9949               | <b>0.9987</b> | 0.9922          | NC            | 0.9868         |
| 2008                       | 0.9924               | <b>0.9984</b> | 0.9940          | NC            | 0.9880         |
| 2009                       | 0.9906               | <b>0.9979</b> | 0.9939          | NC            | 0.9859         |
| 2010                       | 0.9881               | <b>0.9971</b> | 0.9948          | NC            | 0.9872         |
| 2011                       | 0.9862               | <b>0.9962</b> | 0.9946          | NC            | 0.9860         |
| 2012                       | 0.9869               | <b>0.9964</b> | 0.9941          | NC            | 0.9849         |
| <b>Average</b>             | 0.9936               | <b>0.9984</b> | 0.9929          | -             | 0.9875         |

The best fit for each year of observation is highlighted in bold. NC – not converged.

## The number of key carcinogenic events can be predicted from cancer incidence

Aleksey V. Belikov

**Supplementary Table S4. Comparison of the goodness of fit ( $R^2$ ) of different statistical distributions to actual distributions of breast cancer incidence by age.**

| <b>Year of observation</b> | <b>Extreme value</b> | <b>Gamma</b>  | <b>Logistic</b> | <b>Normal</b> | <b>Weibull</b> |
|----------------------------|----------------------|---------------|-----------------|---------------|----------------|
| 1999                       | 0.9978               | <b>0.9982</b> | 0.9888          | 0.9951        | 0.9955         |
| 2000                       | 0.9985               | <b>0.9988</b> | 0.9878          | 0.9951        | 0.9952         |
| 2001                       | 0.9987               | <b>0.9989</b> | 0.9887          | 0.9957        | 0.9957         |
| 2002                       | 0.9990               | <b>0.9992</b> | 0.9888          | 0.9959        | 0.9959         |
| 2003                       | 0.9976               | <b>0.9981</b> | 0.9869          | 0.9942        | 0.9948         |
| 2004                       | 0.9974               | <b>0.9981</b> | 0.9869          | 0.9940        | 0.9949         |
| 2005                       | 0.9967               | <b>0.9974</b> | 0.9864          | 0.9934        | 0.9942         |
| 2006                       | 0.9971               | <b>0.9976</b> | 0.9882          | 0.9945        | 0.9951         |
| 2007                       | 0.9967               | <b>0.9970</b> | 0.9882          | 0.9943        | 0.9947         |
| 2008                       | 0.9963               | <b>0.9967</b> | 0.9888          | 0.9944        | 0.9948         |
| 2009                       | 0.9961               | <b>0.9963</b> | 0.9899          | 0.9948        | 0.9952         |
| 2010                       | 0.9952               | 0.9954        | 0.9917          | 0.9952        | <b>0.9957</b>  |
| 2011                       | 0.9925               | 0.9927        | 0.9905          | NC            | <b>0.9940</b>  |
| 2012                       | 0.9925               | 0.9926        | 0.9910          | 0.9935        | <b>0.9943</b>  |
| <b>Average</b>             | 0.9966               | <b>0.9968</b> | 0.9888          | 0.9946        | 0.9950         |

The best fit for each year of observation is highlighted in bold. NC – not converged.

# The number of key carcinogenic events can be predicted from cancer incidence

Aleksey V. Belikov

**Supplementary Figure S1. Residual plots for the Figure 1: Comparison of different statistical distributions with actual distributions of prostate and breast cancer incidence by age.**

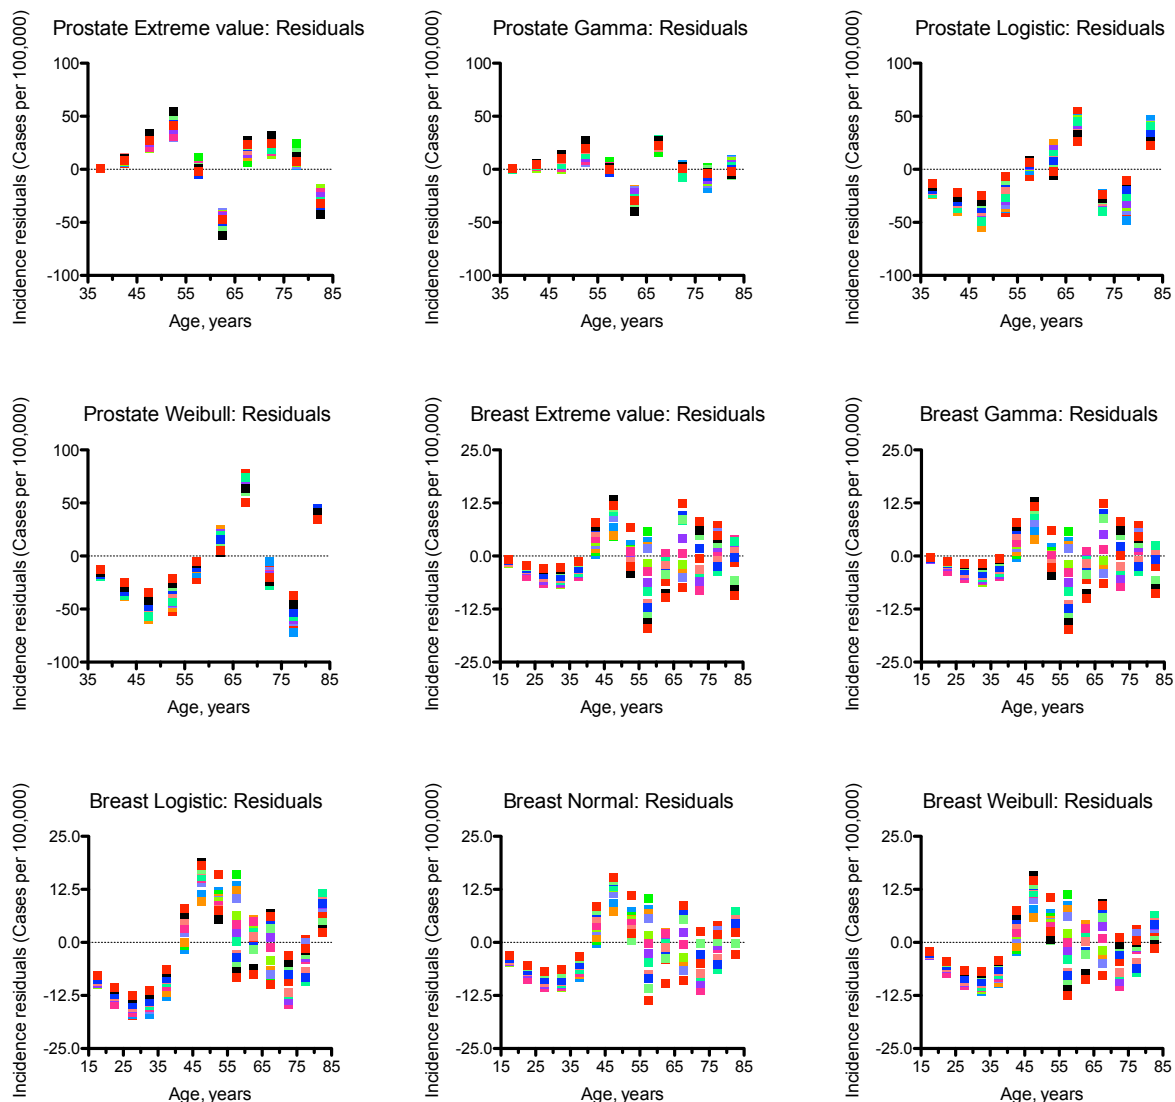

Dots indicate residuals (the difference between the actual data for 5-year age intervals and the values obtained from PDFs fitted to the data). The middle age of each age group is plotted. Different colours indicate different years of observation, from 1999 to 2012. The fitting procedure was identical for all distributions. The normal distribution did not converge for prostate cancer. Prostate and breast cancers were selected due to being the highest-incidence gender-specific cancer types.

## The number of key carcinogenic events can be predicted from cancer incidence

Aleksey V. Belikov

**Supplementary Table S5. Comparison of the standard deviation of the residuals (Sy.x) of different statistical distributions fitted to actual distributions of prostate cancer incidence by age.**

| <b>Year of observation</b> | <b>Extreme value</b> | <b>Gamma</b> | <b>Logistic</b> | <b>Normal</b> | <b>Weibull</b> |
|----------------------------|----------------------|--------------|-----------------|---------------|----------------|
| 1999                       | 25.73                | <b>14.24</b> | 45.09           | NC            | 54.12          |
| 2000                       | 26.61                | <b>14.62</b> | 44.60           | NC            | 53.72          |
| 2001                       | 32.02                | <b>13.37</b> | 39.61           | NC            | 48.72          |
| 2002                       | 25.93                | <b>11.54</b> | 43.43           | NC            | 52.12          |
| 2003                       | 23.68                | <b>13.37</b> | 40.95           | NC            | 49.27          |
| 2004                       | 24.49                | <b>14.77</b> | 40.29           | NC            | 48.32          |
| 2005                       | 25.37                | <b>13.28</b> | 37.43           | NC            | 45.70          |
| 2006                       | 28.36                | <b>13.17</b> | 38.84           | NC            | 49.77          |
| 2007                       | 32.32                | <b>16.42</b> | 39.92           | NC            | 51.74          |
| 2008                       | 35.52                | <b>16.25</b> | 31.55           | NC            | 44.66          |
| 2009                       | 36.75                | <b>17.31</b> | 29.51           | NC            | 44.98          |
| 2010                       | 38.82                | <b>19.19</b> | 25.71           | NC            | 40.38          |
| 2011                       | 41.16                | <b>21.74</b> | 25.87           | NC            | 41.45          |
| 2012                       | 31.64                | <b>16.50</b> | 21.30           | NC            | 34.01          |
| <b>Average</b>             | 30.60                | <b>15.41</b> | 36.01           | -             | 47.07          |

The best fit for each year of observation is highlighted in bold. NC – not converged.

## The number of key carcinogenic events can be predicted from cancer incidence

Aleksey V. Belikov

**Supplementary Table S6. Comparison of the standard deviation of the residuals (Sy.x) of different statistical distributions fitted to actual distributions of breast cancer incidence by age.**

| <b>Year of observation</b> | <b>Extreme value</b> | <b>Gamma</b> | <b>Logistic</b> | <b>Normal</b> | <b>Weibull</b> |
|----------------------------|----------------------|--------------|-----------------|---------------|----------------|
| 1999                       | 5.742                | <b>5.194</b> | 12.98           | 8.554         | 8.200          |
| 2000                       | 4.565                | <b>4.034</b> | 13.12           | 8.296         | 8.226          |
| 2001                       | 4.337                | <b>3.891</b> | 12.62           | 7.833         | 7.747          |
| 2002                       | 3.710                | <b>3.292</b> | 12.24           | 7.420         | 7.449          |
| 2003                       | 5.263                | <b>4.645</b> | 12.22           | 8.159         | 7.695          |
| 2004                       | 5.353                | <b>4.638</b> | 12.06           | 8.132         | 7.547          |
| 2005                       | 6.013                | <b>5.306</b> | 12.26           | 8.560         | 7.979          |
| 2006                       | 5.675                | <b>5.212</b> | 11.50           | 7.847         | 7.396          |
| 2007                       | 6.158                | <b>5.849</b> | 11.69           | 8.104         | 7.839          |
| 2008                       | 6.545                | <b>6.268</b> | 11.49           | 8.127         | 7.802          |
| 2009                       | 6.838                | <b>6.647</b> | 11.02           | 7.910         | 7.617          |
| 2010                       | 7.350                | 7.244        | 9.672           | 7.327         | <b>6.935</b>   |
| 2011                       | 9.258                | 9.158        | 10.47           | NC            | <b>8.336</b>   |
| 2012                       | 9.275                | 9.170        | 10.14           | 8.594         | <b>8.080</b>   |
| <b>Average</b>             | 6.149                | <b>5.753</b> | 11.68           | 8.066         | 7.775          |

The best fit for each year of observation is highlighted in bold. NC – not converged.

## The number of key carcinogenic events can be predicted from cancer incidence

Aleksey V. Belikov

**Supplementary Table S7. The probabilities that different statistical distributions fit better than gamma distribution to actual distributions of prostate cancer incidence by age, calculated according to the Akaike Information Criterion (AIC).**

| <b>Year of observation</b> | <b>Extreme value</b> | <b>Logistic</b> | <b>Normal</b> | <b>Weibull</b> |
|----------------------------|----------------------|-----------------|---------------|----------------|
| 1999                       | 0.27%                | <0.01%          | NC            | <0.01%         |
| 2000                       | 0.25%                | <0.01%          | NC            | <0.01%         |
| 2001                       | 0.02%                | <0.01%          | NC            | <0.01%         |
| 2002                       | 0.03%                | <0.01%          | NC            | <0.01%         |
| 2003                       | 0.33%                | <0.01%          | NC            | <0.01%         |
| 2004                       | 0.63%                | <0.01%          | NC            | <0.01%         |
| 2005                       | 0.15%                | <0.01%          | NC            | <0.01%         |
| 2006                       | 0.05%                | <0.01%          | NC            | <0.01%         |
| 2007                       | 0.11%                | <0.01%          | NC            | <0.01%         |
| 2008                       | 0.04%                | 0.13%           | NC            | <0.01%         |
| 2009                       | 0.05%                | 0.48%           | NC            | <0.01%         |
| 2010                       | 0.09%                | 5.09%           | NC            | 0.06%          |
| 2011                       | 0.17%                | 14.97%          | NC            | 0.16%          |
| 2012                       | 0.15%                | 7.24%           | NC            | 0.07%          |
| <b>Average</b>             | 0.18%                | 2.00%           | -             | 0.03%          |

NC – not converged.



## The number of key carcinogenic events can be predicted from cancer incidence

Aleksey V. Belikov

**Supplementary Table S8. The probabilities that different statistical distributions fit better than gamma distribution to actual distributions of breast cancer incidence by age, calculated according to the Akaike Information Criterion (AIC).**

| Year of observation | Extreme value | Logistic | Normal        | Weibull       |
|---------------------|---------------|----------|---------------|---------------|
| 1999                | 21.35%        | <0.01%   | 0.15%         | 0.26%         |
| 2000                | 16.68%        | <0.01%   | <0.01%        | <0.01%        |
| 2001                | 17.96%        | <0.01%   | <0.01%        | <0.01%        |
| 2002                | 15.81%        | <0.01%   | <0.01%        | <0.01%        |
| 2003                | 14.80%        | <0.01%   | 0.04%         | 0.09%         |
| 2004                | 11.84%        | <0.01%   | 0.04%         | 0.11%         |
| 2005                | 16.42%        | <0.01%   | 0.20%         | 0.50%         |
| 2006                | 23.31%        | <0.01%   | 0.32%         | 0.74%         |
| 2007                | 32.75%        | <0.01%   | 1.03%         | 1.63%         |
| 2008                | 35.28%        | 0.02%    | 2.57%         | 4.45%         |
| 2009                | 40.19%        | 0.08%    | 8.05%         | 12.92%        |
| 2010                | 44.93%        | 1.72%    | 45.98%        | <b>64.77%</b> |
| 2011                | 45.45%        | 14.89%   | NC            | <b>77.25%</b> |
| 2012                | 46.03%        | 19.64%   | <b>71.27%</b> | <b>85.48%</b> |
| <b>Average</b>      | 27.34%        | 2.60%    | 9.98%         | 17.73%        |

When an alternative model is preferred, the probability is highlighted in bold.  
NC – not converged.
